# Supplementary material for: pH-dependent cross-linking of catechols through oxidation via Fe3+and potential implications for mussel adhesion
Source: Royal Society of Chemistry journal article supplement (doi:10.1039/c4ra03178d), 2014-01-01
Supplement: c4ra03178d1.pdf [file c4ra03178d1.pdf]

## Supporting Information

### ***pH-dependent cross-linking of catechols through oxidation via Fe<sup>3+</sup> and potential implications for mussel adhesion***

*Dominic E. Fullenkamp,<sup>1,4,‡</sup> Devin G. Barrett,<sup>1,4,5,‡</sup> Dusty Rose Miller,<sup>8</sup> Josh W. Kurutz,<sup>7</sup> and Phillip B. Messersmith<sup>‡,1-6</sup>*

<sup>1</sup>*Biomedical Engineering Department,* <sup>2</sup>*Materials Science and Engineering Department,* <sup>3</sup>*Chemical and Biological Engineering Department,* <sup>4</sup>*Chemistry of Life Processes Institute,* <sup>5</sup>*Institute for Bionanotechnology in Medicine,* <sup>6</sup>*Robert H. Lurie Comprehensive Cancer Center,* <sup>7</sup>*Integrated Molecular Structure Education and Research Center, Northwestern University, Evanston, IL 60208.*

<sup>8</sup>*Biomolecular Science and Engineering Program, University of California, Santa Barbara, California 93106, USA*

#### ***Author Contributions***

*‡DEF and DGB contributed equally.*

## Supplementary Methods

**Oxidation of 4-methylcatechol (4MC) with Fe<sup>3+</sup> and mass spec (MS) analysis:** 7.4 mg 4MC (Sigma) was dissolved in 800  $\mu$ L water, and 200  $\mu$ L 100 mM FeCl<sub>3</sub> solution was added to produce a final concentration of 60 mM 4MC and 20 mM Fe<sup>3+</sup>. The reaction was allowed to proceed for 24 h. A green precipitate developed. The sample was centrifuged on a bench top minicentrifuge, and the precipitate was dissolved in 100  $\mu$ L methanol. The sample was directly injected onto an Agilent 1100 LC/MSD high performance ion trap mass spectrometer in negative ion mode. Methanol was used as the mobile phase.

**Synthesis of Ac-Ser-DOPA-NH<sub>2</sub>:** Ac-Ser-DOPA-NH<sub>2</sub> was prepared by standard Fmoc solid phase peptide synthesis methods.<sup>1</sup> Reactions were carried out on a Rink amide resin (Novabiochem) using standard reagents: N,N-dimethylformamide (DMF), 20 % piperidine in DMF for cleavage of Fmoc groups, O-benzotriazole-N,N',N'-tetramethyl-uronium-hexafluorophosphate (HBTU) as the coupling reagent, Fmoc-DOPA(Ac)-OH (Novabiochem) and Fmoc-Ser(tBu)-OH as the amino acids, acetic anhydride for capping the amine terminus, and a solution of 95 % trifluoroacetic acid (TFA), 2.5 % water and 2.5% triisopropylsilane (TIPS) for cleavage from the resin. The ninhydrin test was used to confirm each coupling step. The resin (541 mg; 0.335 mmol) was swollen in DMF for 30 min and rinsed twice with DMF. Piperidine (20 % in DMF) was incubated with the resin for 3 min, and this was repeated twice. The resin was rinsed with DMF five times. Fmoc-DOPA(Ac)-OH (461 mg, 1.00 mmol) and HBTU (381 mg, 1.00 mmol) were dissolved in a minimal amount of solvent, followed by the addition of 350  $\mu$ L diisopropylethyl amine (DIPEA, 2.01 mmol). The solution was added to the resin and allowed to react for 1 h. The resin was rinsed twice with DMF, three times with 20 % piperidine (3 min), and five times with DMF. Fmoc-Ser(tBu)-OH (642 mg, 1.67 mmol) and HBTU (635 mg, 1.67 mmol) were dissolved in a minimal amount of DMF, followed by the addition of 583  $\mu$ L DIPEA (3.35 mmol). The solution was added to the resin and allowed to

react for 1 h. The resin was rinsed twice with DMF, three times with 20 % piperidine (3 min), and rinsed five times with DMF. Acetic anhydride (317  $\mu$ L, 3.35 mmol) was dissolved in several mLs of DMF, and 583  $\mu$ L DIPEA (3.35 mmol) was added. The solution was added to the resin, and the reaction was allowed to proceed for 1 h. The resin was rinsed five times with DMF, three times with DCM, and three times with methanol, followed by drying under vacuum for 2 days. The TFA cleavage solution (10 mL) was incubated with the resin for 1 h and collected. The resin was rinsed three times with 10 mL TFA, and the eluent was collected. The solution was evaporated under reduced pressure to <1 mL and precipitated in 25 mL ether. The precipitate was dissolved in ~0.5 mL methanol and precipitated in 5 mL of ether twice. The peptide was then dried under vacuum. Peptide mass and purity were confirmed by HPLC-MS as described in the main text.

## References

1. Chan, W.C. & White, P.D. *Fmoc solid phase peptide synthesis: a practical approach*. (Oxford University Press, New York, 2000).

## Supplementary Results

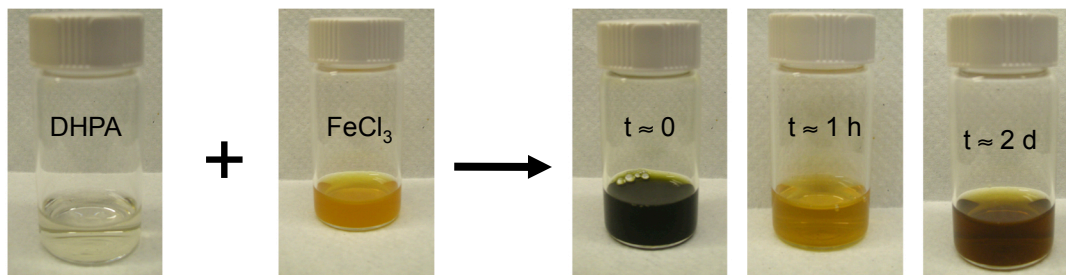

**Figure S1. Digital images of DHPA oxidation.** Digital images of the reaction between DHPA and Fe<sup>3+</sup> performed at an Fe<sup>3+</sup>:DHPA ratio of 2:3.

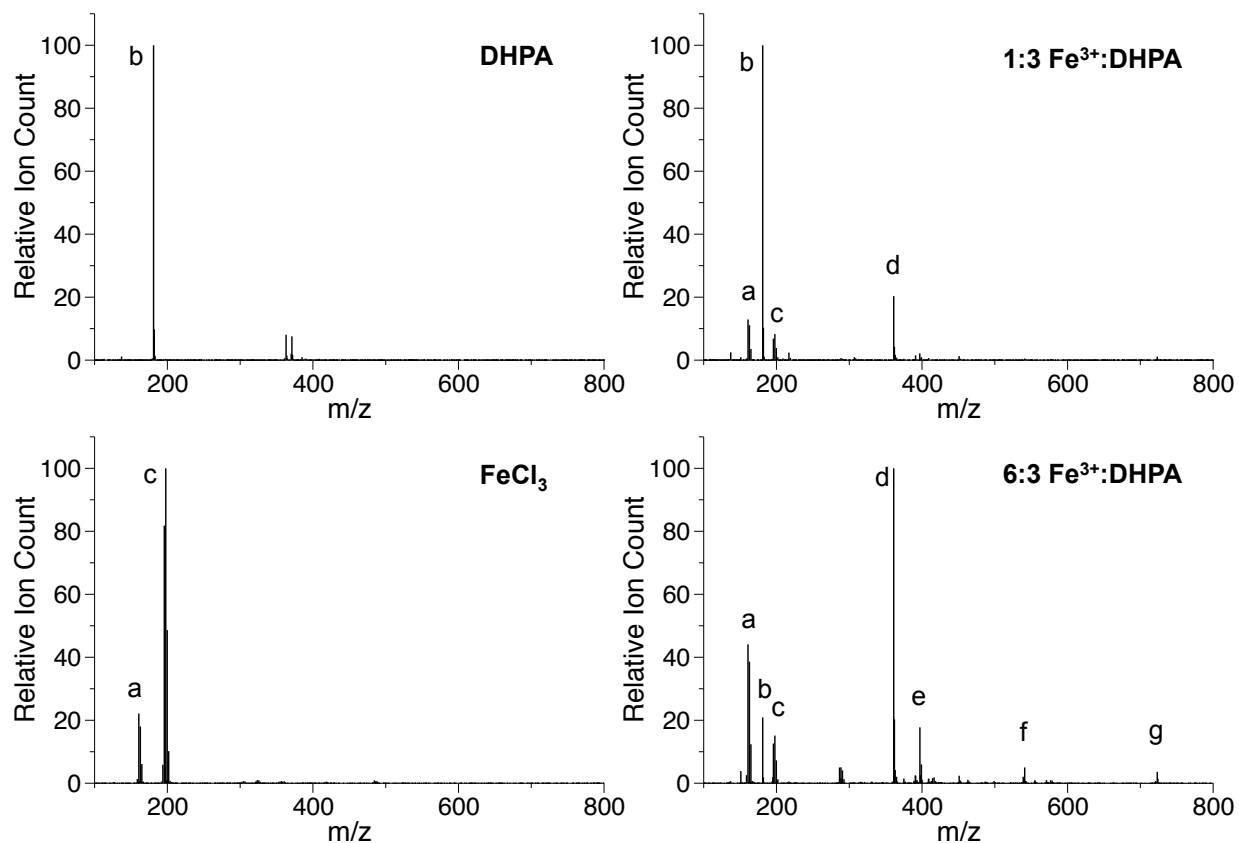

**Figure S2. Mass spectra of DHPA oxidation.** Representative negative MS spectra of direct injection of DHPA, FeCl<sub>3</sub>, and the reaction mixture (1:3 and 6:3, Fe<sup>3+</sup>: DHPA) after 7 d. The solution contained iron species (peaks a and c at m/z of 161 and 198, respectively), DHPA (peak b at m/z of 181), dimers (peak d at m/z of 361), trimers (peak f at m/z of 541), and tetramers (peak g at m/z of 721). Peak e represents dimers associating with a chloride ion (m/z of 397).

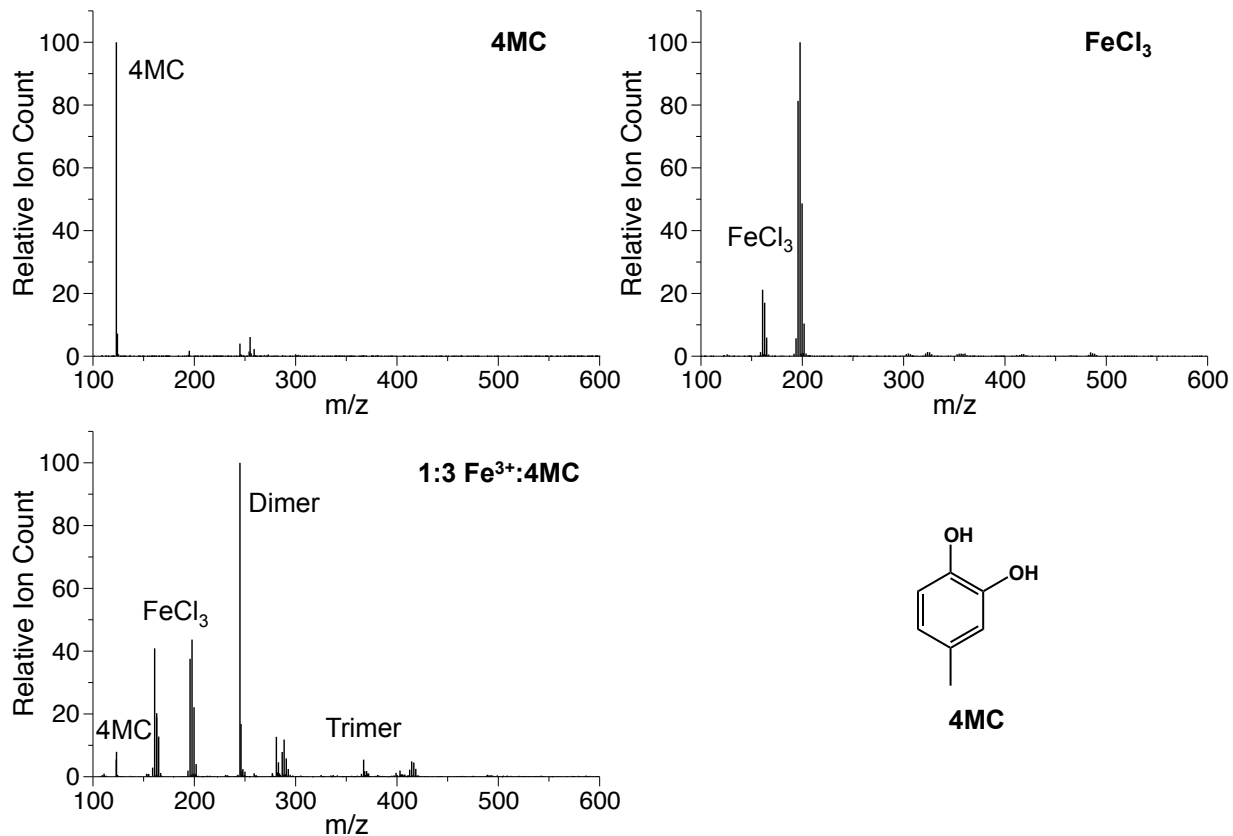

**Figure S3. Mass spectra of 4MC oxidation.** Negative ion MS in methanol of 4MC, FeCl<sub>3</sub>, and 1:3 FeCl<sub>3</sub>: 4MC. Bottom right shows structure of 4MC.

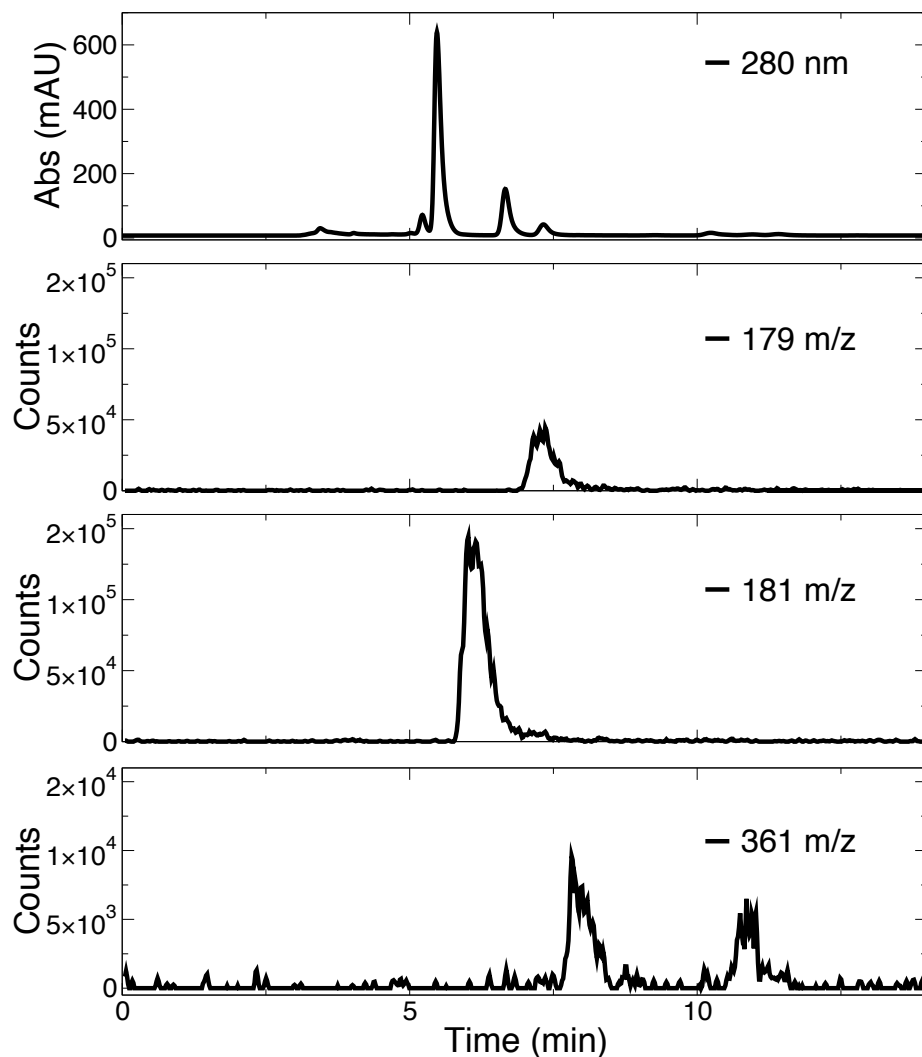

**Figure S4. HPLC-MS extracted ion chromatograms (EICs) of DHPA reaction with  $\text{Fe}^{3+}$ .** Representative results from HPLC-MS characterization of the reaction between DHPA (6 mM) and  $\text{Fe}^{3+}$  (6 mM) after ~100 min of reaction time. EIC in negative ion mode. Top-down: Full UV-Vis (280 nm) trace of the separation; EIC of  $m/z = 179$ , corresponding to oxidized quinone form of DHPA; EIC of  $m/z = 181$ , corresponding to DHPA; EIC of  $m/z = 361$ , corresponding to dimer of DHPA. A short delay in the MS data (~30 s), relative to the HPLC trace, was observed due to distance between the UV-Vis and MS detectors.

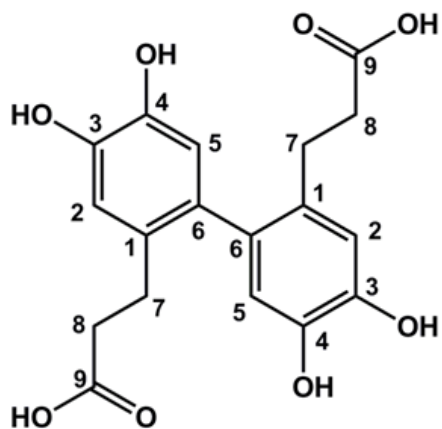

Dimer 1

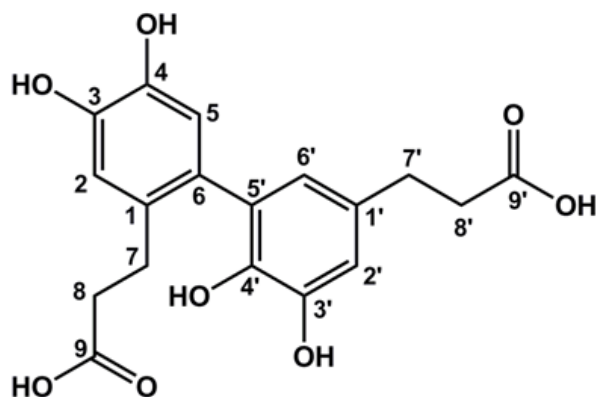

Dimer 2

**Figure S5. DHPA dimer labeling system.** Labeled structures of Dimer 1 and Dimer 2. This numbering system is used to identify protons and carbons in the subsequent NMR characterization.



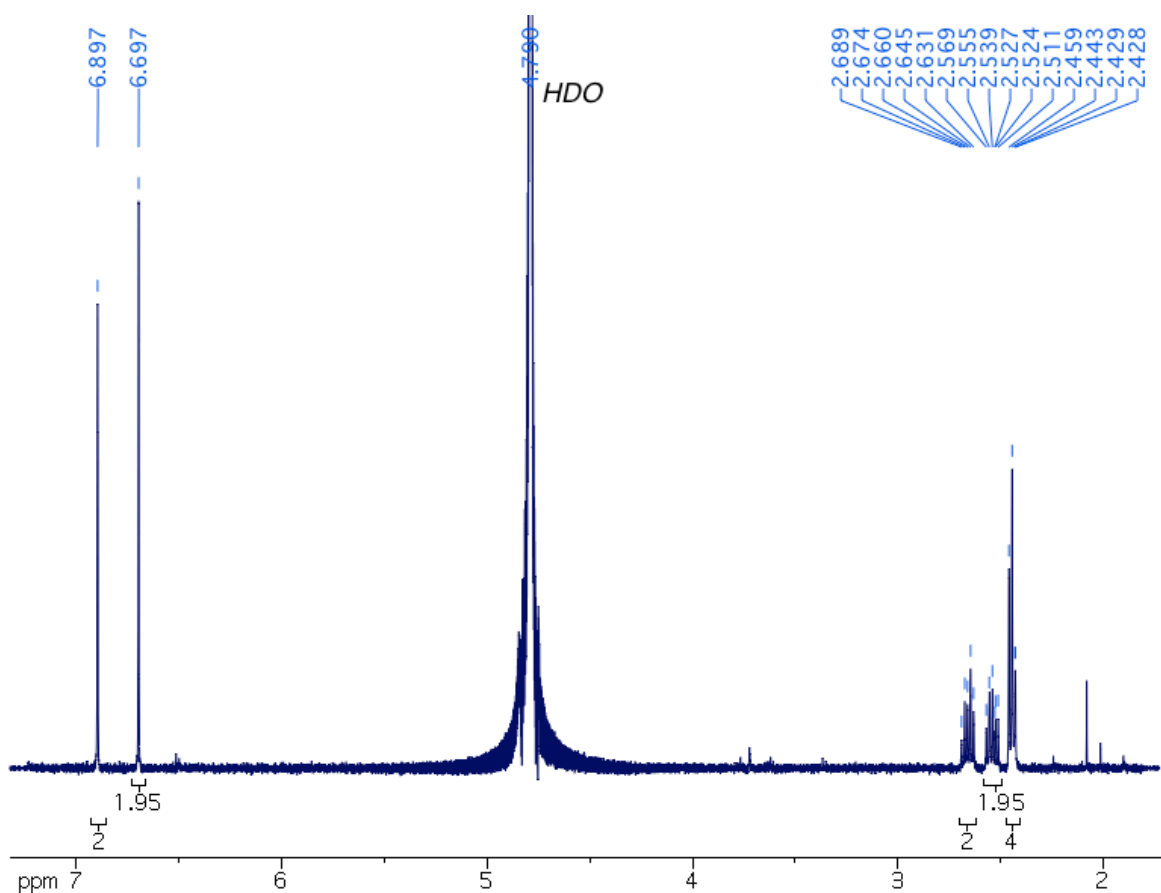

**Figure S6. Dimer 1  $^1\text{H}$  NMR.** 500 MHz  $^1\text{H}$  spectrum of the compound isolated from the Dimer 1 peak at 7.5 min, acquired at 25 °C and referenced to residual HDO at 4.790 ppm.

$^1\text{H}$ -NMR (499 MHz;  $\text{D}_2\text{O}$ ):  $\delta$  6.90 (d,  $J$  = 0.3 Hz, H-2), 6.70 (d,  $J$  = 0.3 Hz, H-5), 2.66 (dt,  $J$  = 14.4, 7.3 Hz, H-7a), 2.57-2.51 (dt,  $J$  = 14.4, 7.3 Hz, H-7b), 2.46-2.43 (t,  $J$  = 7.3 Hz, H-8).

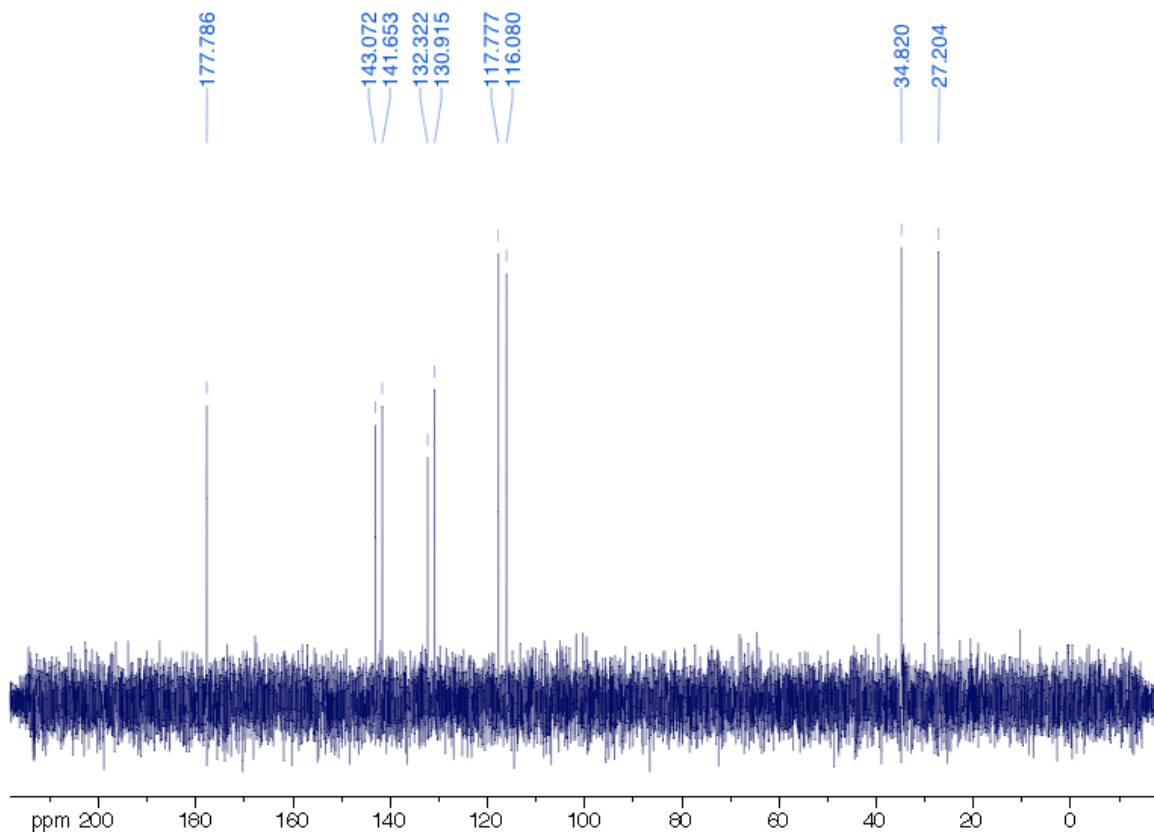

**Figure S7. Dimer 1  $^{13}\text{C}$  NMR.**  $^{13}\text{C}$  spectrum of the compound isolated from the Dimer 1 peak at 7.5 min, acquired at 25 °C on a 500 MHz NMR spectrometer, and indirectly referenced to residual HDO.

$^{13}\text{C}$ -NMR (126 MHz,  $\text{D}_2\text{O}$ ):  $\delta$  177.79 (C-9), 143.07 (C-3 or C-4), 141.65 (C-4 or C-3), 132.32 (C-6), 130.92 (C-1), 117.78 (C-5), 116.08 (C-2), 34.82 (C-8), 27.20 (C-7).

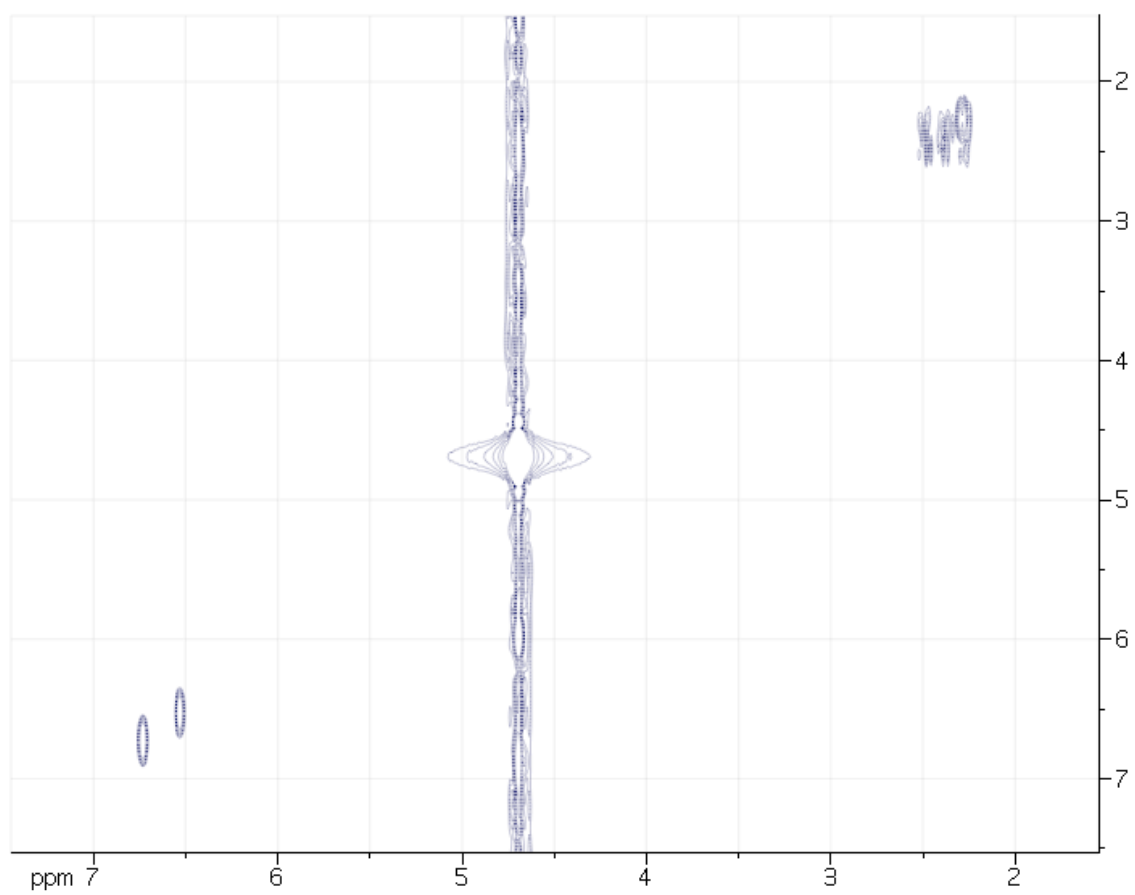

**Figure S8. Dimer 1  $^1\text{H}$ - $^1\text{H}$  COSY.**  $^1\text{H}$ - $^1\text{H}$  COSY of the compound isolated from the Dimer 1 peak at 7.5 min, acquired at 25 °C on a 500 MHz NMR spectrometer, and referenced to residual HDO at 4.79 ppm.

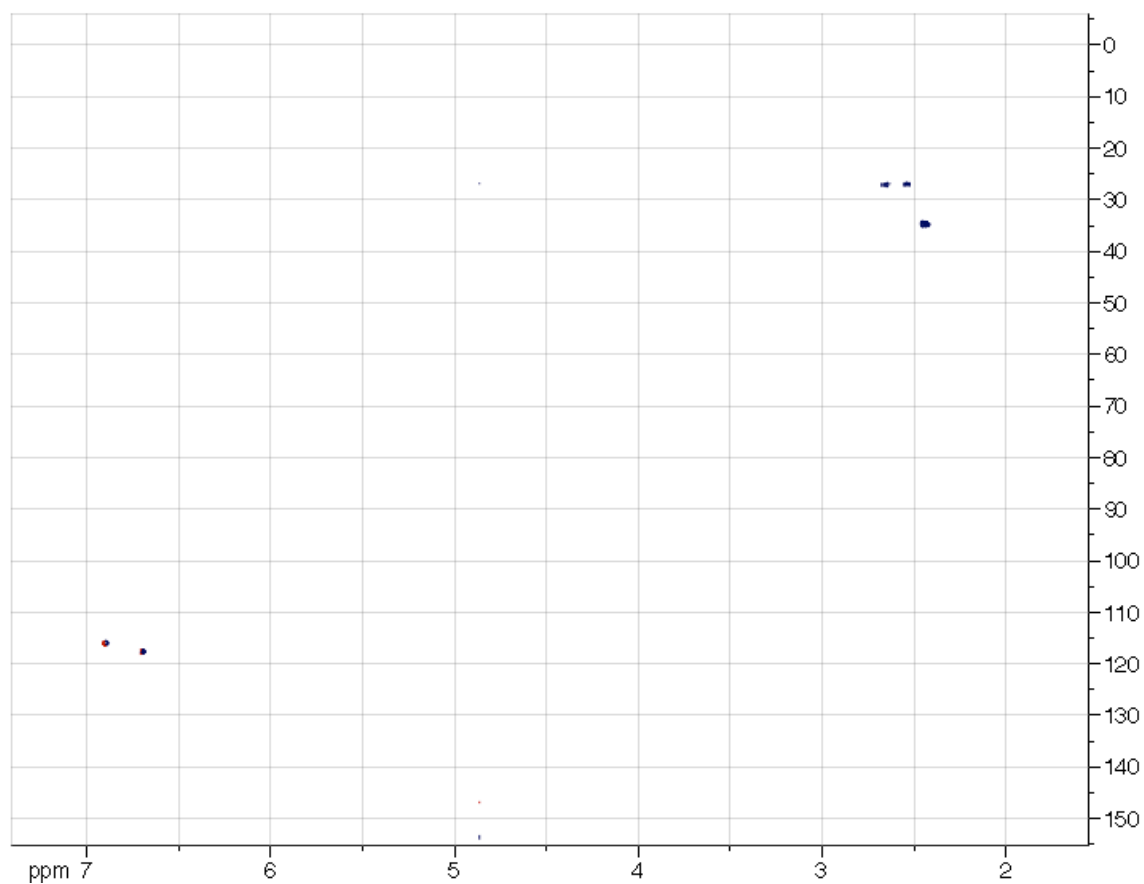

**Figure S9. Dimer 1  $^1\text{H}$ - $^{13}\text{C}$  HSQC.**  $^1\text{H}$ - $^{13}\text{C}$  HSQC of the compound isolated from the Dimer 1 peak at 7.5 min, acquired at 25 °C on a 500 MHz NMR spectrometer.

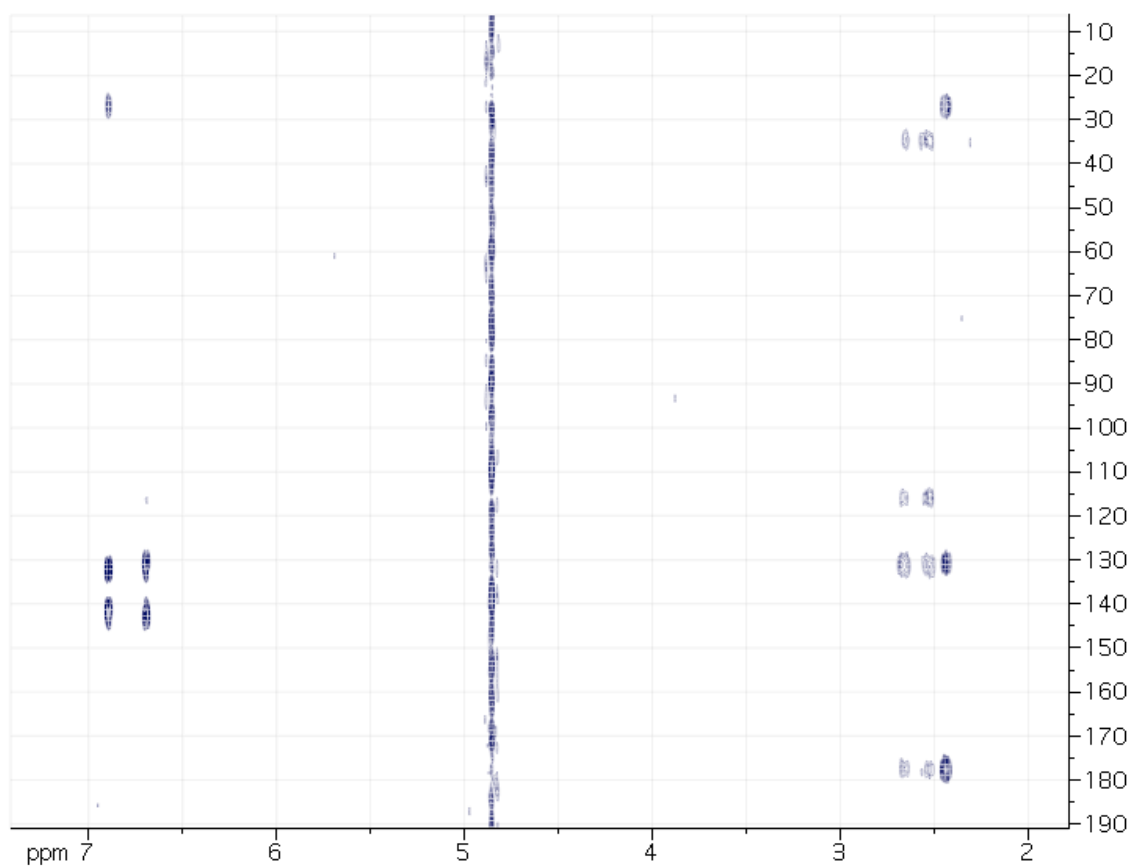

**Figure S10. Dimer 1  $^1\text{H}$ - $^{13}\text{C}$  HMBC.**  $^1\text{H}$ - $^{13}\text{C}$  HMBC of the compound isolated from the Dimer 1 peak at 7.5 min, acquired at 25 °C on a 500 MHz NMR spectrometer.

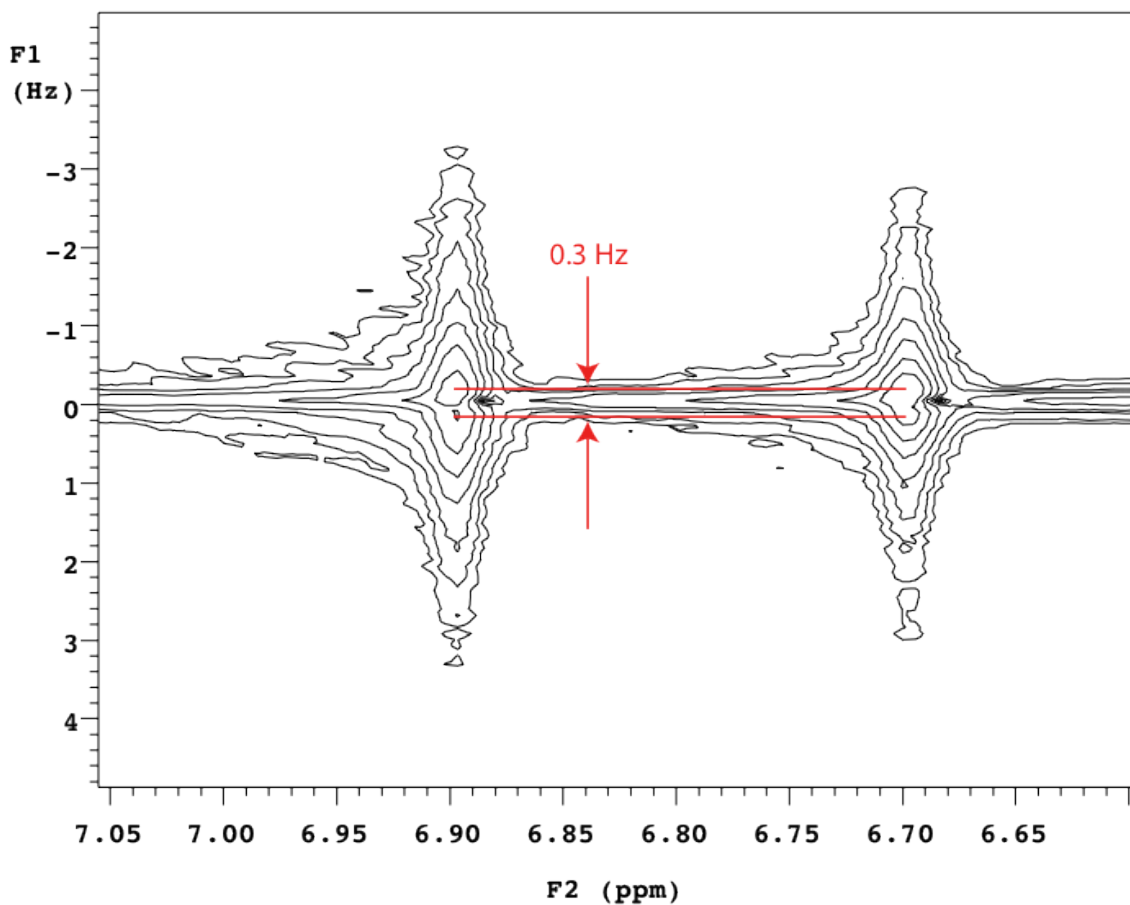

**Figure S11. Dimer 1 2D-J NMR.** Aromatic region of the  $^1\text{H}$ - $^1\text{H}$  homonuclear 2D-J correlation spectrum of the compound isolated from the Dimer 1 peak at 7.5 min, acquired at 25 °C on a 500 MHz NMR spectrometer.

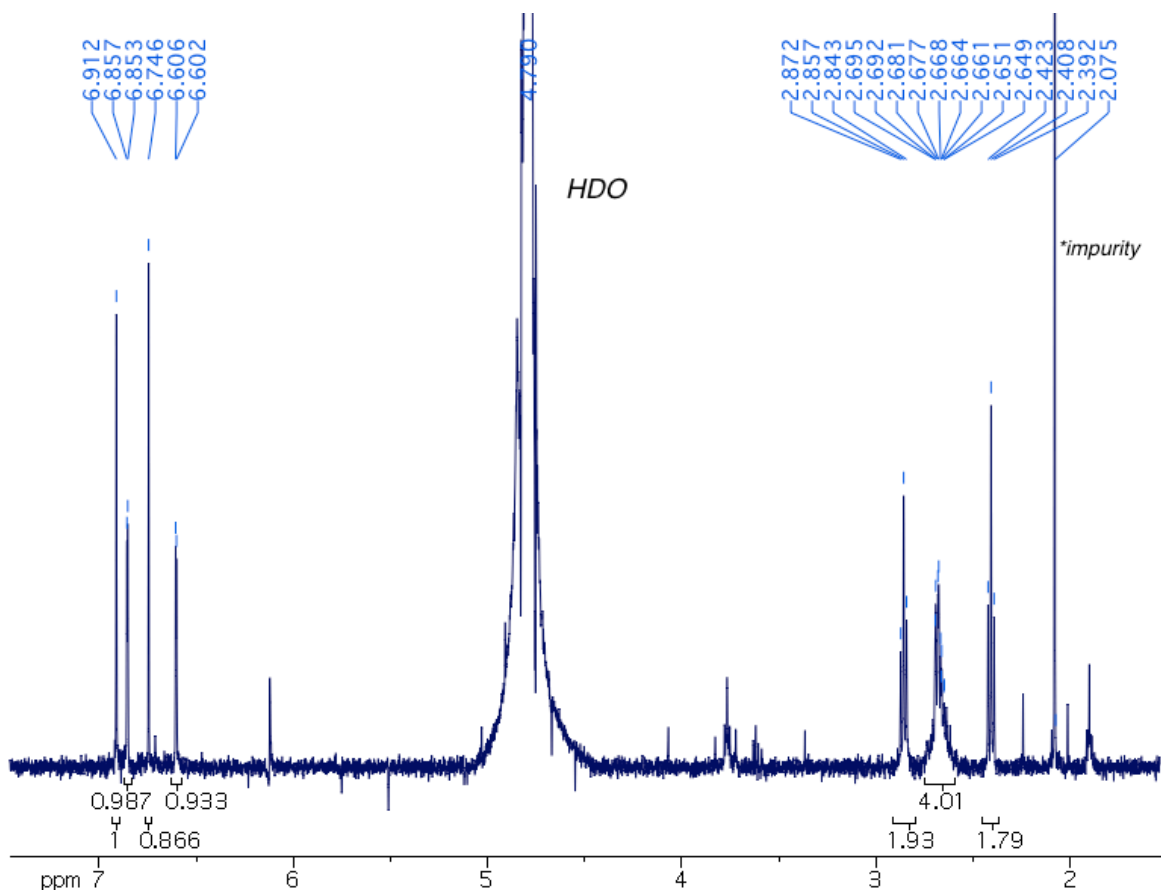

**Figure S12. Dimer 2  $^1\text{H}$  NMR.** 500 MHz  $^1\text{H}$  NMR spectrum of the compound isolated from the Dimer 2 peak at 10.5 min, acquired at 25 °C and referenced to HDO at 4.79 ppm.

Dimer 2, ring with para protons:

$^1\text{H}$ -NMR (499 MHz;  $\text{D}_2\text{O}$ ):  $\delta$  6.91 (d,  $J$  = 0.3 Hz, H-2), 6.75 (d,  $J$  = 0.3 Hz, H-5), 2.65 (dt,  $J$  = 14.0, 7.7 Hz, H-7), 2.41 (t,  $J$  = 7.7 Hz, H-8).

Dimer 2, Ring with meta protons:

$^1\text{H}$ -NMR (499 MHz;  $\text{D}_2\text{O}$ ):  $\delta$  6.86 (d,  $J$  = 2.1 Hz, H-6'), 6.60 (d,  $J$  = 2.1 Hz, H-2'), 2.86 (t,  $J$  = 7.4 Hz, H-7'), 2.68 (dt,  $J$  = 14.0, 7.4 Hz, H-8').

Carbons assignments were derived from  $^1\text{H}$ - $^{13}\text{C}$  HSQC and HMBC data because the sample for the compound isolated from the Dimer 2 peak at 10.5 min was too dilute.

Dimer 2, ring with para protons:

$^{13}\text{C}$ -NMR (126 MHz,  $\text{D}_2\text{O}$ ):  $\delta$  177.91 (C-9), 141.3-143.8 (C-3 & C-4), 131.61 (C-1 or C-6), 129.12 (C-6 or C-1), 117.59 (C-5), 116.41 (C-2), 34.91 (C-8), 27.24 (C-7).

Dimer 2, ring with meta protons:

$^{13}\text{C}$ -NMR (126 MHz,  $\text{D}_2\text{O}$ ):  $\delta$  177.91 (C-9'), 139.22 (C-4'), 132.7 (C-1'), 121.81 (C-2'), 114.76 (C-6'), 35.56 (C-8'), 29.44 (M-C-7), (C-3' & -5' are unassigned).

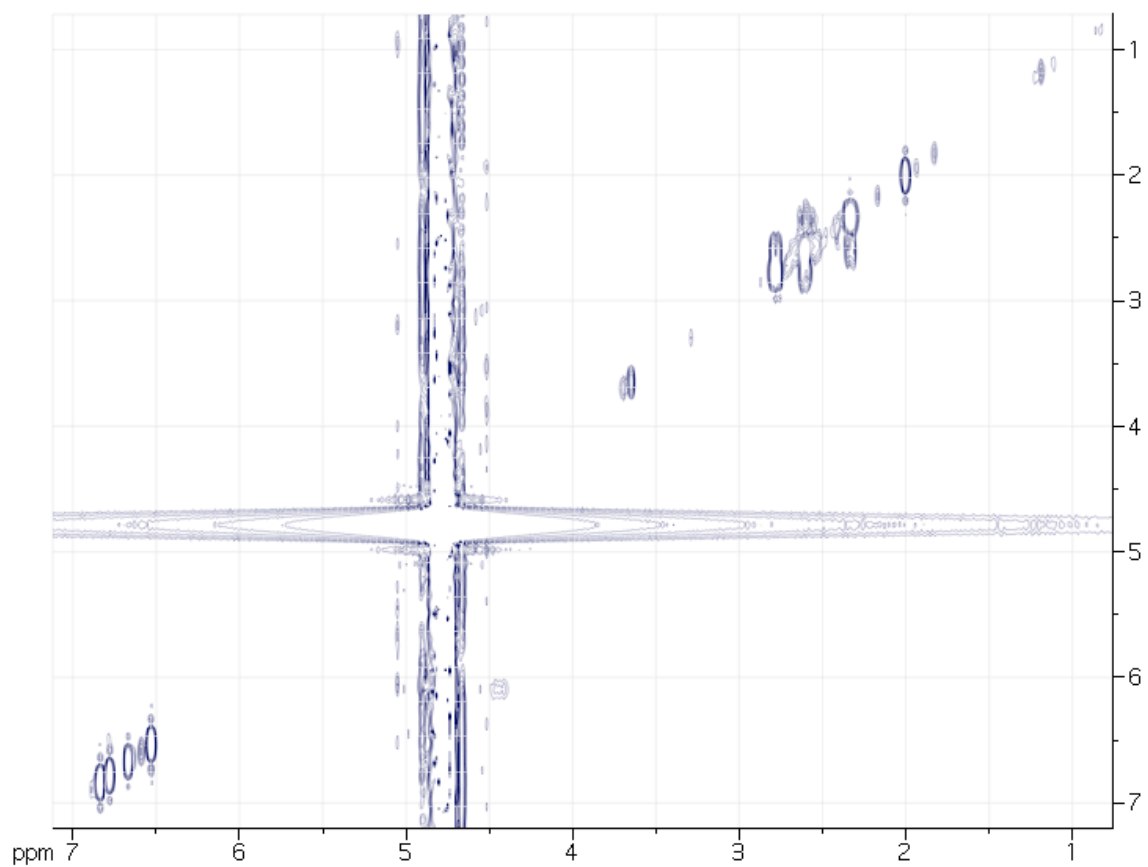

**Figure S13. Dimer 2  $^1\text{H}$ - $^1\text{H}$  COSY.**  $^1\text{H}$ - $^1\text{H}$  COSY of the compound isolated from the Dimer 2 peak at 10.5 min, acquired at 25 °C on a 500 MHz NMR spectrometer.



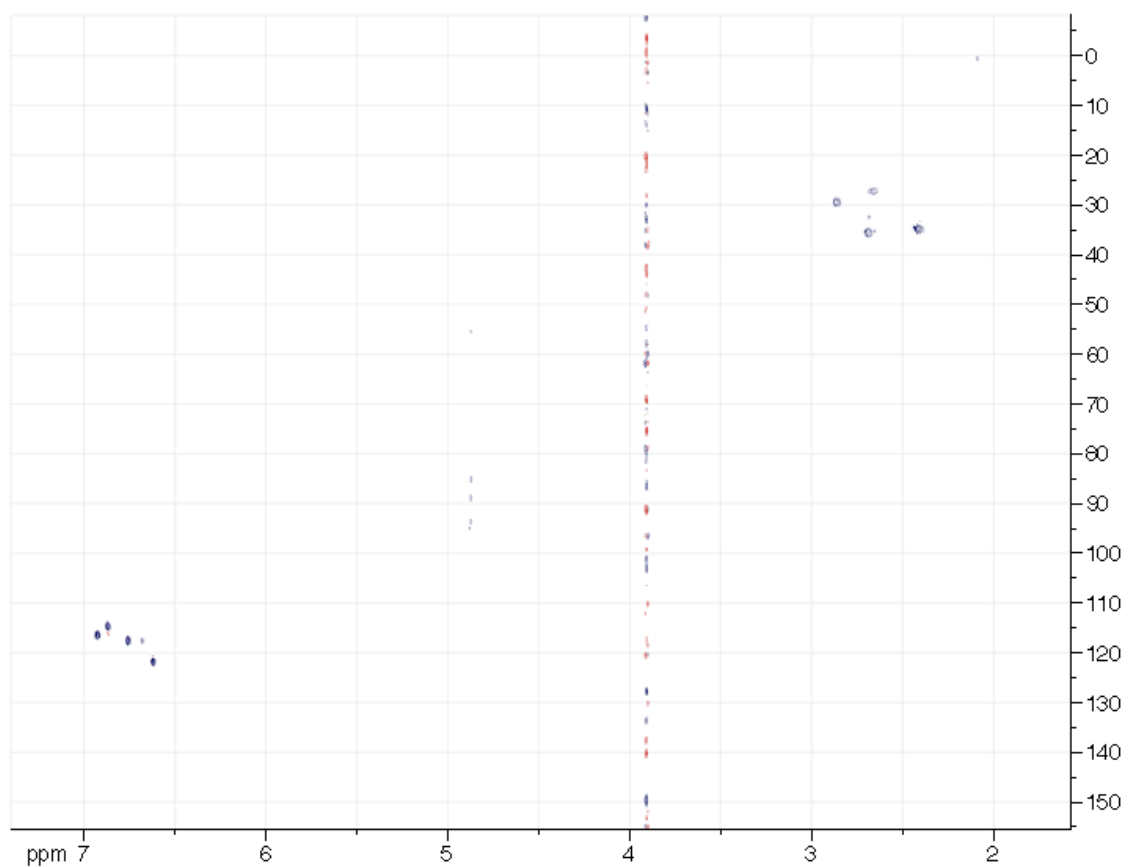

**Figure S14. Dimer 2  $^1\text{H}$ - $^{13}\text{C}$  HSQC.**  $^1\text{H}$ - $^{13}\text{C}$  HSQC of the compound isolated from the Dimer 2 peak at 10.5 min, acquired at 25 °C on a 500 MHz NMR spectrometer.

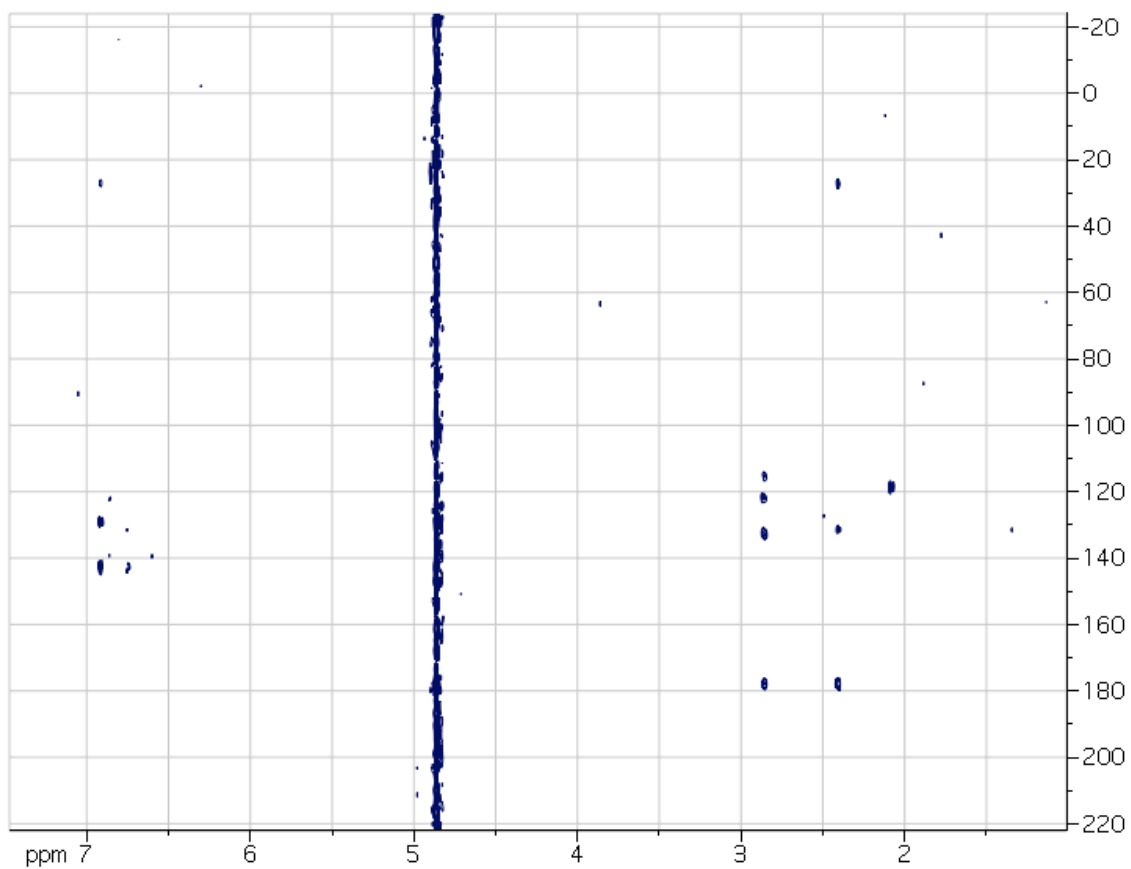

**Figure S15. Dimer 2  $^1\text{H}$ - $^{13}\text{C}$  HMBC.**  $^1\text{H}$ - $^{13}\text{C}$  HMBC of the compound isolated from the Dimer 2 peak at 10.5 min, acquired at 25 °C on a 500 MHz NMR spectrometer.

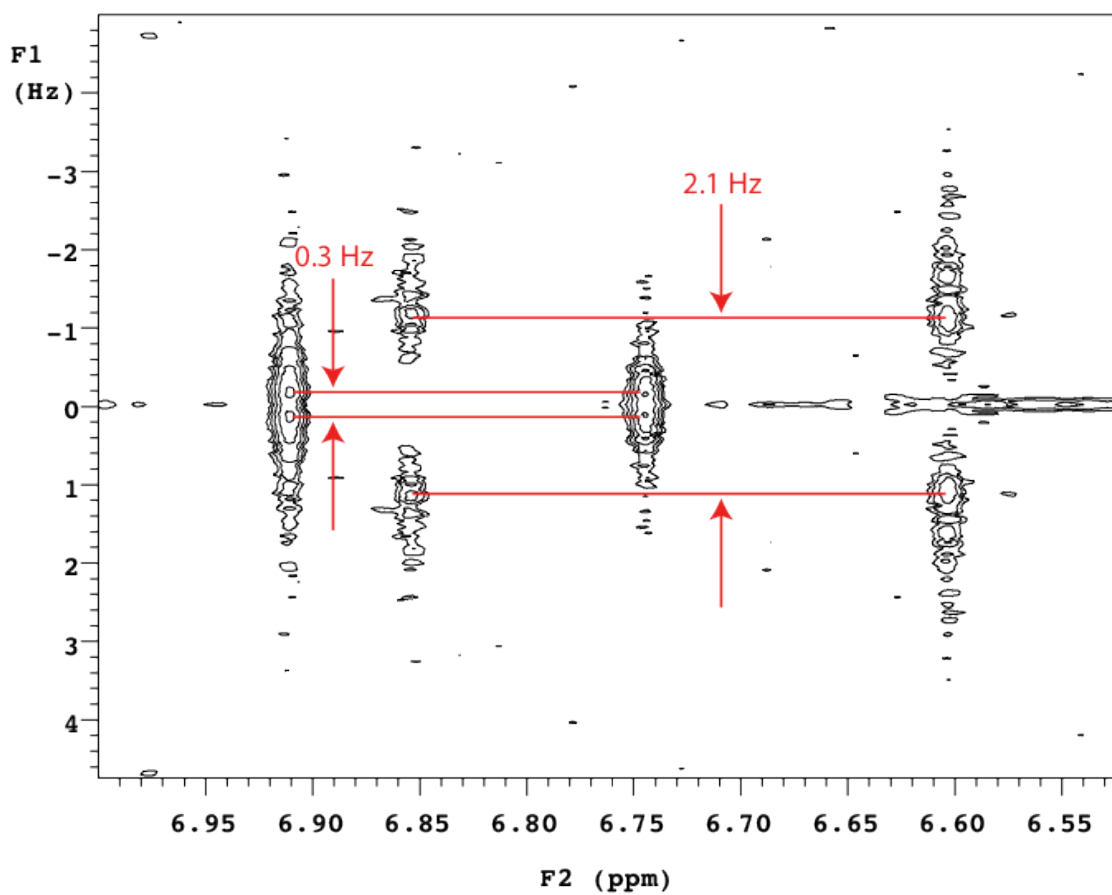

**Figure S16. Dimer 2 2D-J NMR.**  $^1\text{H}$  homonuclear 2D-J correlation spectrum of the compound isolated from the Dimer 2 peak at 10.5 min, acquired at 25 °C on a 500 MHz spectrometer.

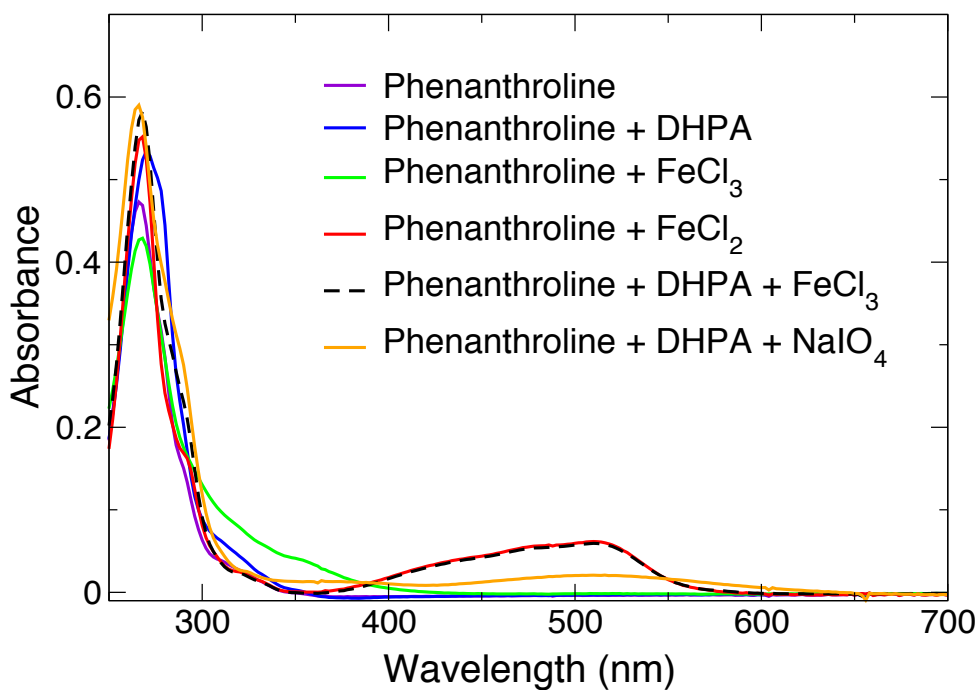

**Figure S17. UV-Vis confirmation of the reduction of Fe<sup>3+</sup> to Fe<sup>2+</sup> in the presence of DHPA.** The interaction between 1,10-phenanthroline and Fe<sup>2+</sup> results in a color change from yellow/orange to deep red. The transition to a red solution was only observed for solutions containing phenanthroline and Fe<sup>2+</sup> or phenanthroline, DHPA, and Fe<sup>3+</sup>.

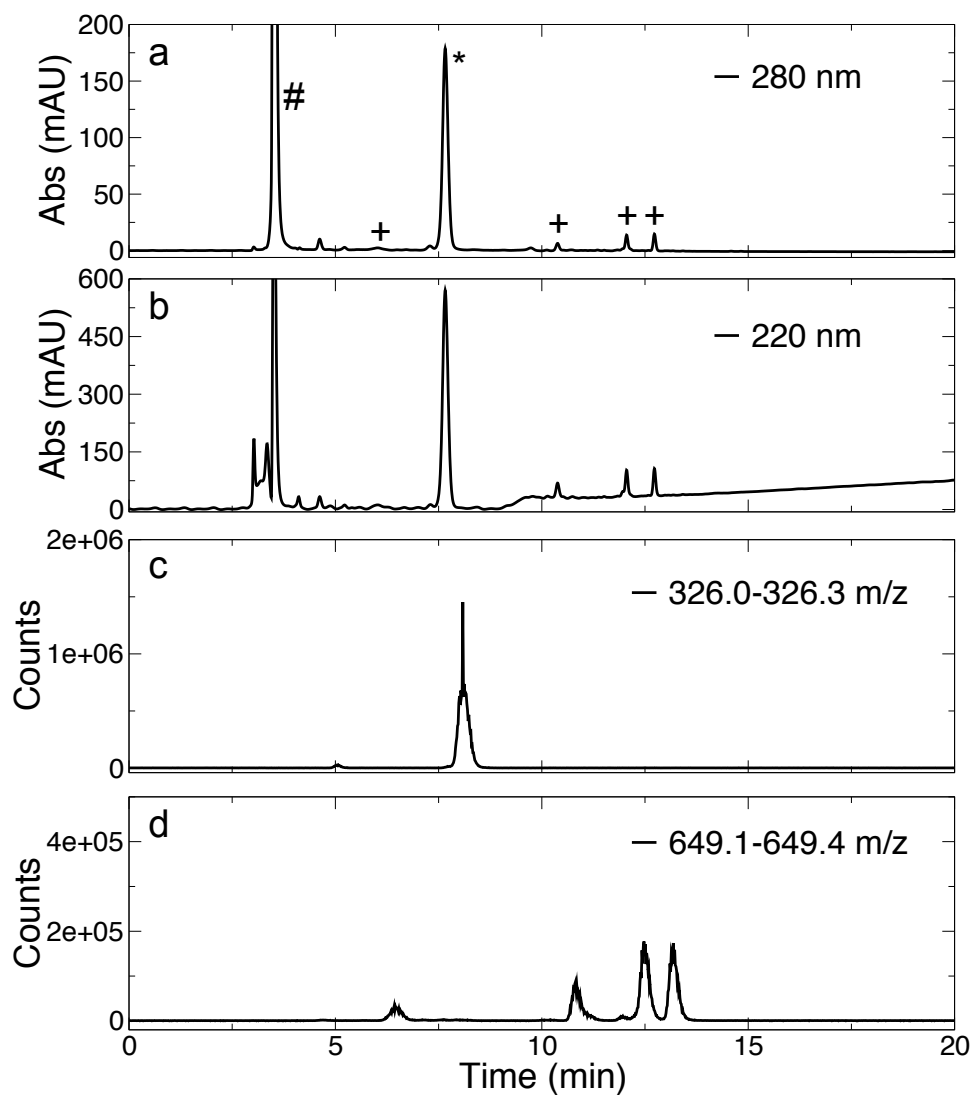

**Figure S18. HPLC-MS EIC of pH 5 dipeptide with  $1xFe^{3+}$ .** Representative HPLC-MS experiment of Ac-Ser-DOPA-NH<sub>2</sub> at pH 5 and  $1xFe^{3+}$ . UV chromatograms at (a) 280 and (b) 220 nm. Peaks correspond to (#) EDTA/Fe injection peak, (\*) peptide, and (+) dimer of peptide. Negative ion mode EIC of (c) mass of the peptide and (d) mass of dimer of the peptide. EICs allow for identification of UV chromatogram peaks.

**Table S1. Relative abundance of DHPA, o-quinone, and dimers<sup>a</sup>**

| [Fe <sup>3+</sup> ]:<br>[DHPA] | [Fe <sup>3+</sup> ]<br>(mM) | [DHPA]<br>(mM) | Time of<br>Reaction | Amount<br>DHPA<br>(%) | Amount<br>Quinone<br>(%) | % of Total Dimer |                  |
|--------------------------------|-----------------------------|----------------|---------------------|-----------------------|--------------------------|------------------|------------------|
|                                |                             |                |                     |                       |                          | Dimer 1<br>C6-C6 | Dimer 2<br>C5-C6 |
| 0:1                            | 0                           | 60             | NA                  | 100                   | 0                        | -                | -                |
| 1:3                            | 20                          | 60             | 7 d                 | 77                    | 0                        | 72               | 29               |
| 2:3                            | 40                          | 60             | 7 d                 | 57                    | 0                        | 76               | 24               |
| 3:3                            | 60                          | 60             | 1 min               | 60                    | 4.66                     | 76               | 24               |
| 3:3                            | 60                          | 60             | 37 min              | 43                    | 9.24                     | 77               | 23               |
| 3:3                            | 60                          | 60             | 189 min             | 43                    | 1.98                     | 77               | 23               |
| 3:3                            | 60                          | 60             | 618 min             | 43                    | 1.31                     | 78               | 22               |
| 3:3                            | 60                          | 60             | 1 d                 | 46                    | 0.99                     | 78               | 22               |
| 3:3                            | 60                          | 60             | 7 d                 | 43                    | 0                        | 78               | 22               |
| 4:3                            | 80                          | 60             | 7 d                 | 29                    | 0                        | 80               | 20               |
| 6:3                            | 120                         | 60             | 7 d                 | 12                    | 0                        | 85               | 15               |

<sup>a</sup>As determined by the areas under the HPLC curves of Figure 3
